# Supplementary material for: Distinct Antibody Responses to Endemic Coronaviruses Pre- and Post-SARS-CoV-2 Infection in Kenyan Infants and Mothers
Source: MDPI journal article supplement (doi:10.3390/v14071517), 2022-07-12
Supplement: s1 [file s1]

| <b>Genus</b>            | <b>Subgenus</b>      | <b>Virus</b> | <b>% spike sequence identity with SARS-CoV-2</b> |
|-------------------------|----------------------|--------------|--------------------------------------------------|
| <i>Betacoronavirus</i>  | <i>Sarbecovirus</i>  | SARS-CoV-2   | --                                               |
|                         |                      | SARS-CoV-1   | 76 [ref 17]                                      |
|                         | <i>Embecovirus</i>   | HCoV-OC43    | 30 [ref 17]                                      |
|                         |                      | HCoV-HKU1    | 29 [ref 17]                                      |
| <i>Alphacoronavirus</i> | <i>Duvinacovirus</i> | HCoV-229E    | 31 [NCBI BLAST]                                  |
|                         | <i>Setracovirus</i>  | HCoV-NL63    | 31 [NCBI BLAST]                                  |

**Table S1.** *Virus classification and spike protein sequence identity with respect to SARS-CoV-2 spike.*

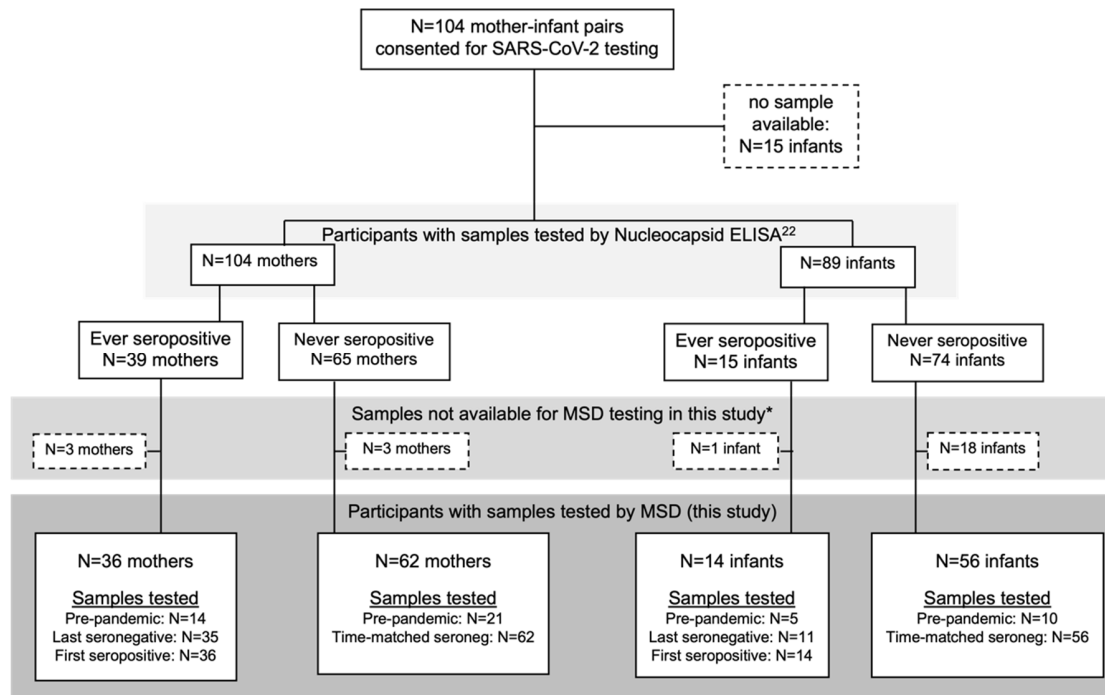

**Figure S1.** Participant and sample grouping flow chart. Consenting women and their infants were originally tested for SARS-CoV-2 by Nucleocapsid ELISA [22] and were further grouped for this sub-study as indicated. \*Never seropositive participants required a “Time-matched seronegative” sample in the time window of the last negative sample from the Seroconverters (December 2019-April 2020). The collecting clinic had to pause collection during this time window due to COVID-19 restrictions and therefore infants born in early 2020 often lack a sample in this time window [22].

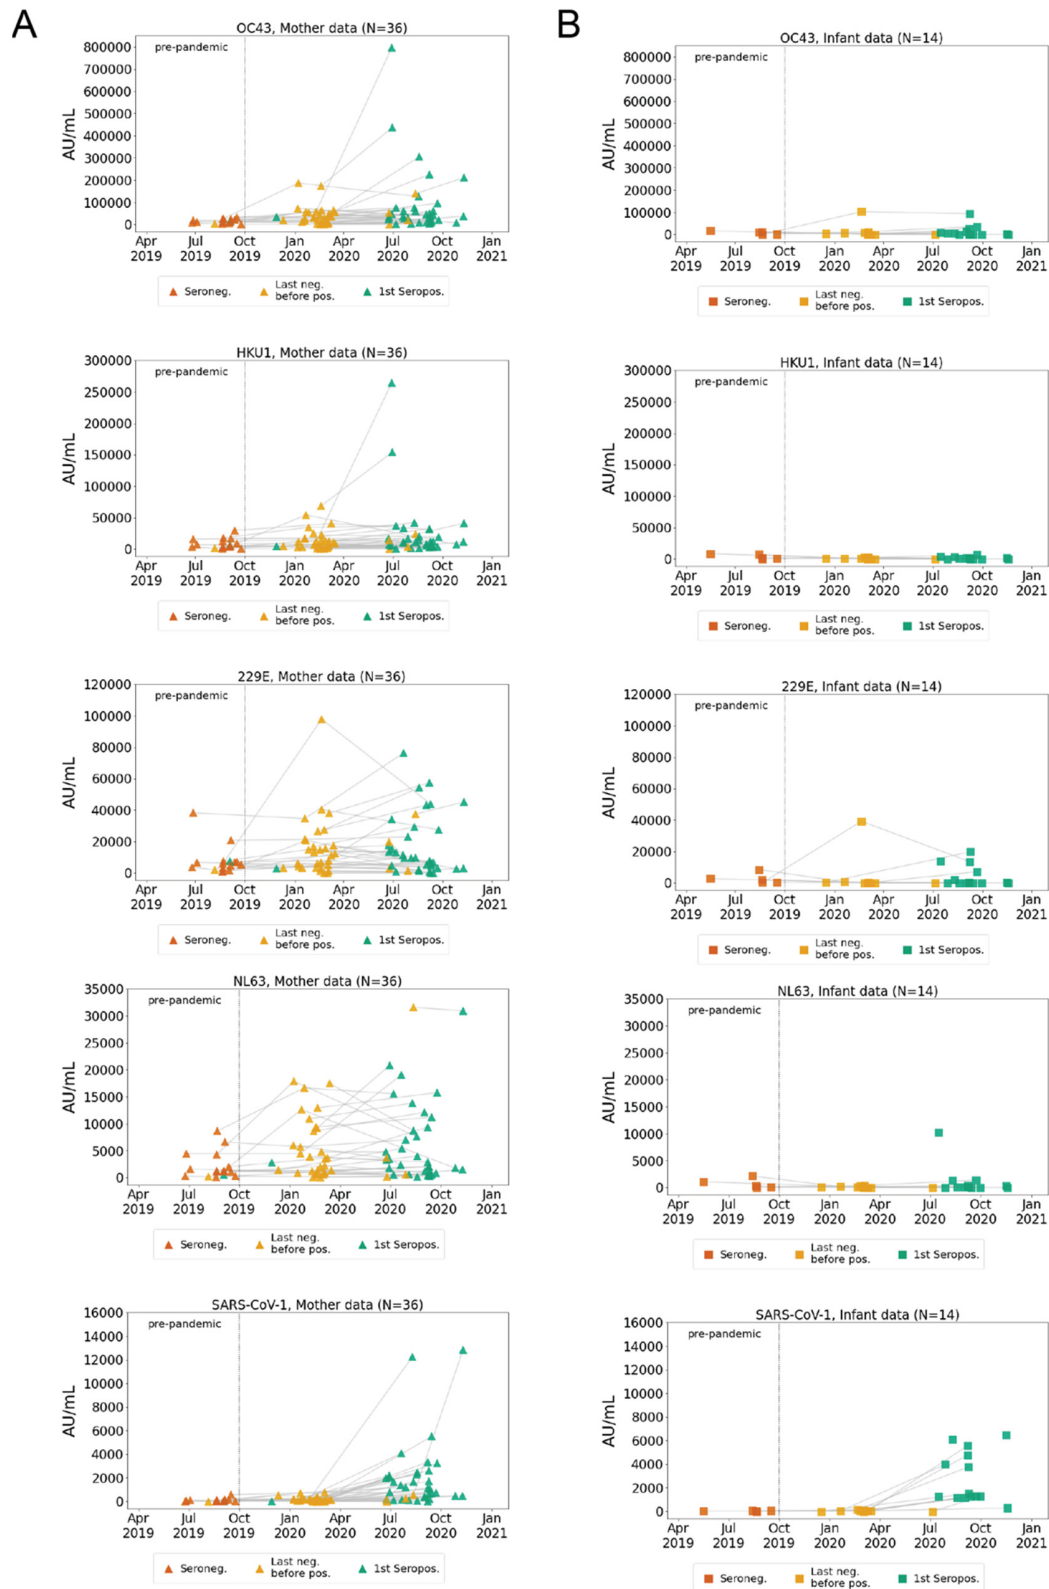

**Figure S2.** Longitudinal antibody binding responses to eHCoVs and SARS-CoV-1 in individuals that eventually seroconverted to SARS-CoV-2. IgG titers (AU/mL) over time for indicated HCoVs; left panels, eventually SARS-CoV-2 seroconverting mothers (N = 36); right panels, eventually SARS-CoV-2 seroconverting infants (N = 14).

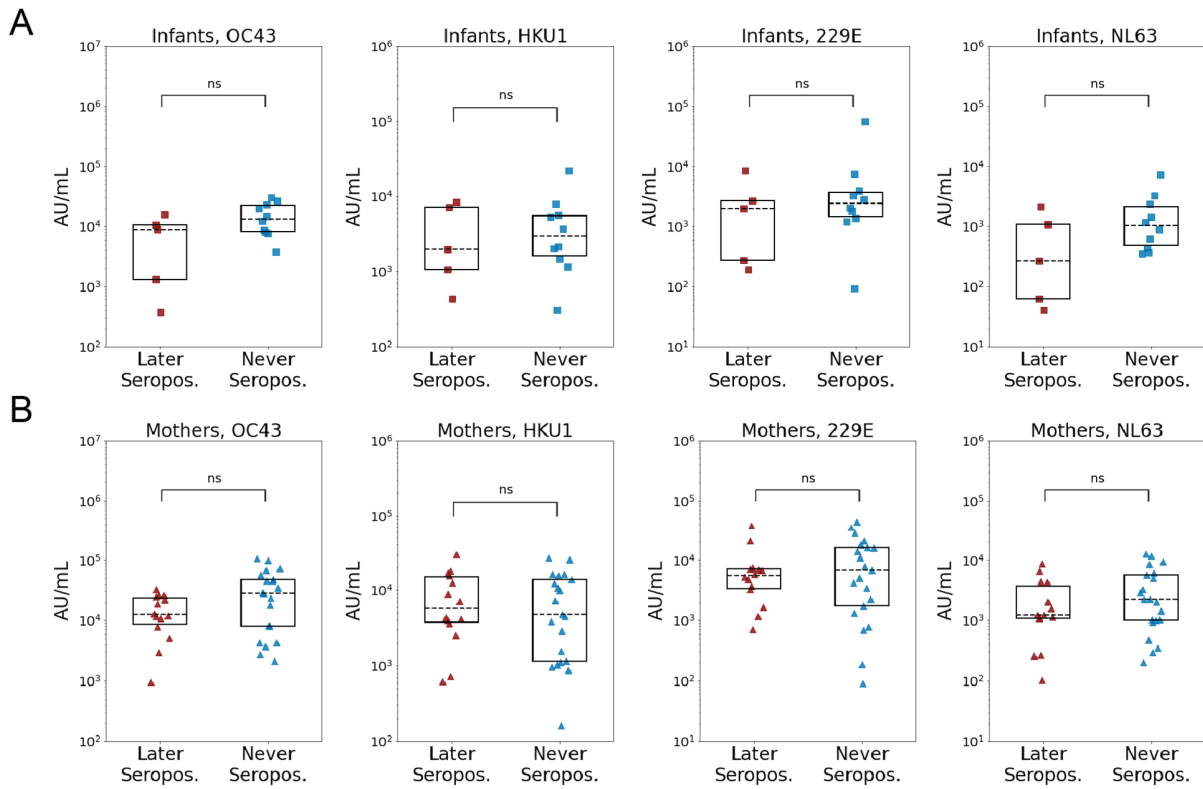

**Figure S3.** Relationship between pre-pandemic eHCoV antibody titer and SARS-CoV-2 serostatus in infants and mothers. (A) eHCoV antibody titers in infants that later became seropositive (N = 5) or were never seropositive (N = 10) for SARS-CoV-2. (B) eHCoV antibody titers in mothers that later became seropositive (N = 14) or were never seropositive (N = 21) for SARS-CoV-2. P values (A and B) were calculated using Wilcoxon rank-sum test with Bonferroni correction for multiple hypothesis testing. (ns)  $P > 0.05$ , (\*)  $P \leq 0.05$ , (\*\*)  $P \leq 0.01$ , (\*\*\*)  $P \leq 0.001$ , (\*\*\*\*)  $P \leq 0.0001$ .
